# Supplementary material for: Genomic differentiation of endangered polyploid Braya (Brassicaceae) populations in the limestone barrens ecosystem at risk support separate management units
Source: Research Square preprint supplement (doi:10.21203/rs.3.rs-7798193/v1), 2025-10-13
Supplement: Supplementary file 1 [file aa94b01b857b75336657336b.docx]

**Supplementary Material**

**Genomic differentiation of endangered polyploid *Braya* (Brassicaceae) populations in the limestone barrens ecosystem at risk support separate management units**

**Author Information**

Nathan MacNeil*1, Maria Esther Nieto-Blazquez*2†, Lourdes Peña-Castillo1,3, Luise Hermanutz1, Julissa Roncal1

1Memorial University of Newfoundland, Department of Biology, St. John’s, Newfoundland and Labrador, Canada

2Senckenberg Biodiversity and Climate Research Centre, Department of Molecular Ecology, Frankfurt am Main, Germany

3Memorial University of Newfoundland, Department of Computer Science, St. John’s, Newfoundland and Labrador, Canada

**Supplementary Methods**

**Table S1.** GBS-SNP-CROP parameter values.

| Parameter definition | Parameter | Value |
| --- | --- | --- |
| Minimum depth when secondary allele count is zero | mnHoDepth0 | 5 |
| Minimum depth when secondary allele count is one | mnHoDepth1 | 20 |
| Minimum allele depth for calling heterozygotes | mnHetDepth | 3 |
| Alternative allele strength | altStrength | 0.962 |
| Minimum ratio of more frequent allele depth to less frequent allele depth | mnAlleleRatio | 0.25 |
| Minimum percentage of individuals genotyped to keep a variant | mnCall | 0.75 |
| Minimum average depth | mnAvgDepth | 3 |
| Maximum average depth | mxAvgDepth | 200 |

**Figure S1.** Schematic diagram showing the eight demographic models compared in fastsimcoal2. Population acronym as follows. For *B. longii* SC/ShCD= Sandy Cove and Shoal Cove Disturbed, YP= Yankee Point. For *B. fernaldii* CN/AP= Cape Norman and Anchor Point, and GIB/WB/BB= Green Island Brook, Wild Bight and Bellburns. NANC refers to the MRCA effective population size of *Braya* species in Newfoundland and AN refers to the ancestral effective population size of each population. TIME refers to the different divergence times (specified as historical events) in the analysis. Arrows indicate gene flow between populations.

**
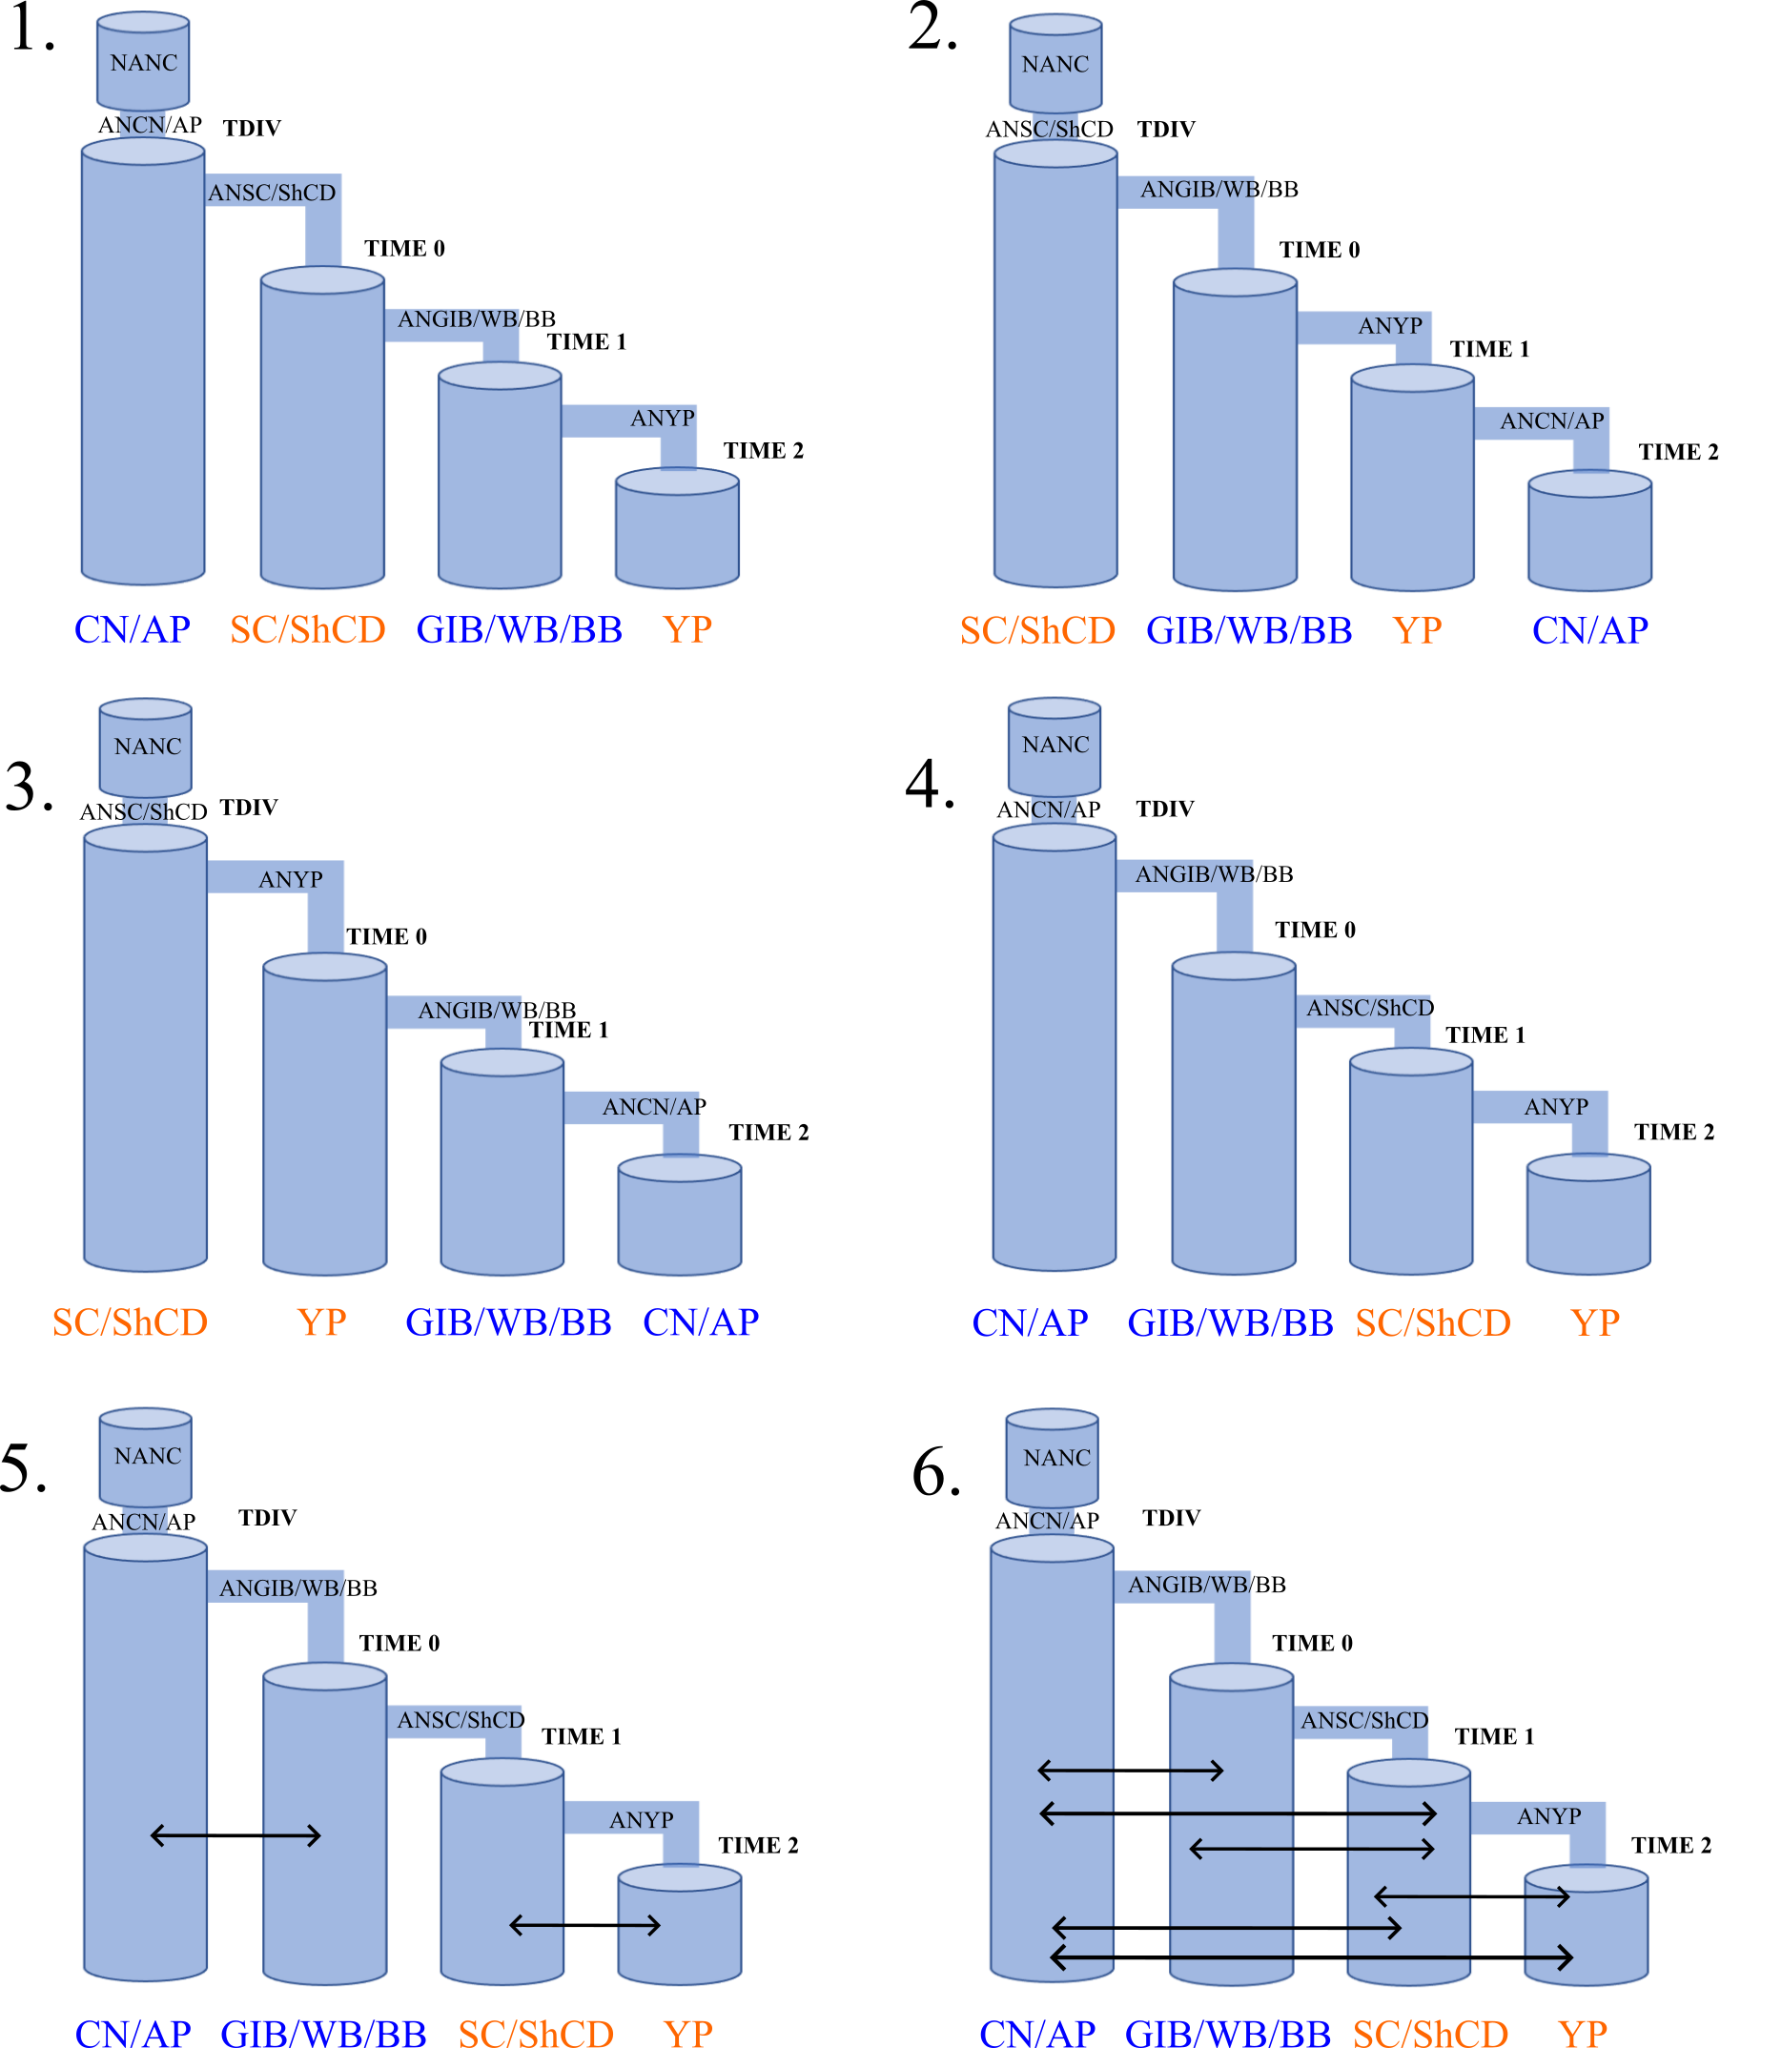
**

**Supplementary Results**

**Table S2**. MaxEstLhood, MaxObsLhood, Bayesian Information Criterion (BIC) and parameters estimates obtained for the six demographic models tested in using fastsimcoal2. Estimates in bold indicate the best-fitting demographic model. NANC refers to the MRCA effective population size of *Braya* species in Newfoundland. TDIV represents the divergence time between the Newfoundland ancestor and the first Newfoundland population, while TIME refers to the various historical divergence events shown in Figure S1. All times are given in generations. NPOP* and NPOPA* refers to the effective population size and ancestral effective population size of each population, respectively. Mig* refers to migration events between populations.

|  | **Model 1** | **Model 2** | **Model 3** | **Model 4** | **Model 5** | **Model 6** |
| --- | --- | --- | --- | --- | --- | --- |
| **MaxEstLhood** | -36538.697 | -36456.24 | -36493.134 | -36700.221 | **-34326.798** | -34513.146 |
| **MaxObsLhood** | -10903.547 | -10903.547 | -10903.547 | -10903.547 | **-10903.547** | -10903.547 |
| **BIC** | 73091.9513 | 72927.0373 | 73000.8253 | 73414.9993 | **68668.1533** | 69040.8493 |
| **NANC** | 86513 | 83636 | 83157 | 76888 | **83374** | 83567 |
| **TDIV** | 987 | 1017 | 945 | 974 | **937** | 972 |
| **TIME0** | 762 | 793 | 723 | 611 | **692** | 782 |
| **TIME1** | 455 | 463 | 395 | 432 | **430** | 452 |
| **TIME2** | 170 | 111 | 161 | 148 | **117** | 137 |
| **NPOPA0** | 64029 | 66286 | 47956 | 69767 | **74134** | 63545 |
| **NPOPA1** | 48237 | 69216 | 58440 | 80382 | **64160** | 55222 |
| **NPOPA2** | 72132 | 56010 | 48250 | 49377 | **74101** | 48835 |
| **NPOPA3** | 73771 | 56653 | 79941 | 57432 | **65291** | 76412 |
| **NPOP0** | 53240 | 42353 | 51872 | 68926 | **58224** | 82962 |
| **NPOP1** | 68877 | 86379 | 45521 | 79187 | **65417** | 47622 |
| **NPOP2** | 67536 | 40259 | 74140 | 53285 | **45863** | 55390 |
| **NPOP3** | 83122 | 57667 | 57409 | 68963 | **69811** | 53746 |
| **Mig03** | - | - | - | - | **8.47E-10** | 1.25E-07 |
| **Mig30** | - | - | - | - | **7.11E-05** | - |
| **Mig12** | - | - | - | - | **1.91E-06** | - |
| **Mig21** | - | - | - | - | **1.53E-07** | 6.02E-06 |
| **Mig02** | - | - | - | - | - | 2.50E-04 |
| **Mig20** | - | - | - | - | - | 8.40E-09 |
| **Mig01** | - | - | - | - | - | 4.09E-07 |
| **Mig10** | - | - | - | - | - | - |
| **Mig32** | - | - | - | - | - | **-** |
| **Mig13** | - | - | - | - | - | 4.69E-07 |
| **Mig23** | - | - | - | - | - | 5.85E-07 |
| **Mig31** | - | - | - | - | - | 1.02E-09 |
